# Supplementary material for: A semi-synthetic regulon enables rapid growth of yeast on xylose
Source: PubMed Central journal article supplement (PMC5964326; doi:10.1038/s41467-018-03645-7), 2018-03-26
Supplement: 41467_2018_3645_MOESM1_ESM.pdf [file 41467_2018_3645_MOESM1_ESM.pdf]

**A semi-synthetic regulon enables rapid growth of yeast on xylose**

**Endalur Gopinarayanan et al.**

## **Supplemental Note 1: Characterization of expression strengths of GAL-activated versus constitutive promoters**

To assess which Gal4p-mediated genes assist in growth on galactose, we compared growth between strains that have Leloir genes under GAL-activated promoters (WT strain, GAL-REG) and constitutive promoters (GAL-CONS). First, we compared the expression strengths of GAL-activated (*GAL1p*, *GAL7p*, and *GAL10p*) and constitutive promoters (*TEF1p*, *TPI1p*, and *GPM1p*) by placing EGFP gene downstream of these promoters. Since the WT strain has a single copy of Leloir pathway genes, we placed the *GAL<sub>promoter</sub>* – EGFP constructs in pRS406 integration plasmid and knocked it into the *URA3* locus of the chromosome. To account for locus-based expression differences, we also cloned the constructs in low copy plasmids (2 – 5 copy number<sup>1</sup>) and considered them to be the maximum possible expression of GAL promoters in the WT strain. Next, we cloned EGFP under constitutive promoters in multicopy pRS426 plasmid and compared their fluorescence in galactose (**Supplementary Fig.1a**). Comparing the results, we observe that the constitutive promoters in high copy plasmids have stronger expression strength than single copy GAL promoters integrated in the chromosome or similar expression strength with low-copy GAL promoters. This observation is consistent with mRNA expression data obtained from RNA-seq analysis (**Supplementary Fig.1b**).

## Supplementary Note 2: Engineering Gal3p mutants for better binding to xylose

The fluorescence profile of Gal3p titrated with varying concentrations of xylose suggested that Gal3p can accommodate xylose (**Fig. 3B**). Further, it is known that upon binding to its ligand, Gal3p undergoes a conformational change that enables it to dimerize with, and sequester, Gal80p and activate the GAL regulon. Since Gal3p-Gal80p interaction is the key step involved in activation of the GAL regulatory system, we decided to strengthen its interaction by mutagenizing Gal3p<sup>2</sup>. Analysis of the Gal3p-Gal80p<sup>3</sup> co-crystal structure revealed two loops on Gal3p that interacts with Gal80p (**Supplementary Fig.2A**). Residues from 93-115 (referred as loop 1) form a dynamic loop that remains closed when Gal3p is in *apo*-form but opens up during Gal3p-galactose interaction. A second stationary loop (loop 2) from 345-381 also interacts with Gal80p. We carried out random mutagenesis using error-prone PCR (epPCR) on the two loops, to obtain a mutant library of 10<sup>4</sup> variants with loops 1 and 2 having an average of 1.2 ± 0.8 and 1.1 ± 0.5 amino acid mutations respectively. After selection and screening with 2 % xylose, we obtained a mutant, Gal3p-1.1, which had a significantly higher fluorescence in xylose than Gal3p-WT (**Supplementary Fig.2B**). Next, we characterized the fluorescence profile of the mutant by varying the concentration of xylose from 4 % to 0.002 % and observed more than 7-fold increase in fluorescence above 2 % xylose concentration (**Fig. 3C**). Fluorescence dropped down significantly at xylose concentrations below 0.2 % and was indistinguishable from the control, confirming that the mutation did not result in constitutive activation of the GAL regulon. We sequenced the mutant and found it to be an A109T mutation. Analysis of the Gal3p crystal structure shows A109 residue present on the dynamic loop of Gal3p facing Gal80p (**Supplementary Fig.2A**). When Gal3p-1.1 was titrated with different concentrations of galactose, we observed a 100-fold increase in sensitivity to galactose as well (**Fig. 3D**). Taken together, results indicate that the mutation seems to increase Gal3p-Gal80p interaction efficiency resulting in increased sensitivity and fluorescence upon induction with xylose and galactose.

To explore other residues at position 109 that could improve fluorescence, we carried out single site saturation mutagenesis with NNK codons to obtain a diversity of 32 codons and screened 3,000 variants (~100-fold coverage). The fluorescence profile of the best mutant, Gal3p-2.1 (A109V mutation), indicated a marked increase in signal strength and sensitivity at 2 % and 0.2 % xylose. In fact, there was an almost twelve-fold change in fluorescence at 2 % xylose (**Fig. 3C**). Simultaneously, we also explored mutations that could further increase the GAL regulon induction strength through epPCR based random mutagenesis on the entire protein with Gal3p-1.1 as the template. From a library of 10<sup>5</sup> variants with an amino acid mutation rate of 1.9 ± 0.8, through selection and screening, we obtained three variants with better fluorescence profiles (**Supplementary Fig.2B**). All three variants showed increased signal strengths. Gal3p-3.1 and Gal3p-3.3 exhibited ten-fold increase in signal at 2 % xylose. Gal3p-3.2 had much lower

fold induction values due to higher background fluorescence (**Fig. 3C**). Although the fold change varied between the mutants, the fluorescence at 2 % xylose concentration were relatively similar and comparable to Gal3p-2.1 mutant. However, the fold increase in fluorescence at 0.2 % xylose was less than five-fold in these mutants. Previous studies on xylose metabolism in *S. cerevisiae* have suggested transport as a rate limiting step at low xylose concentrations<sup>4</sup>. To alleviate any possible xylose transport limitations, we knocked-in an engineered xylose transporter *GAL2-2.1*<sup>5,6</sup> at the *LEU* locus of VEG16 to create VEG20, which was used for the next round of mutagenesis.

Sequencing of the Gal3p-3.1, Gal3p-3.2, and Gal3p-3.3 mutants revealed that some of the mutations introduced during random mutagenesis arose close to one another (**Supplementary Table 3**). We employed a primer-based synthetic shuffling strategy<sup>7</sup> to combine mutations using multiple primers containing degenerate codons that coded for wild-type or the mutated nucleotides. We amplified and spliced together six fragments with *GAL3-2.1* as the template to cover the eight mutations from variants 3.1, 3.2, and 3.3 and transformed VEG20 with the library for functional selection. Since the motivation to use synthetic shuffling was to obtain mutants with better sensitivity, we carried out selection and screening at 0.2 % xylose. The best mutant, Gal3p-Syn4.1 showed a fluorescence profile with lower background, higher sensitivity, and a ten-fold increase in fluorescence at 0.2 % xylose (**Fig. 3C**).

### Supplementary Note 3: ODE models for single and dual feedback systems:

The feedback models were adapted from Venturelli et al.<sup>8</sup> with modifications as described in the methods section, including all of the parameters used (**Supplementary Table 4**). Fluorescence assay for measuring Gal3p-WT-galactose-Gal80p interaction was compared with the model prediction. While dual and single feedback showed a difference as predicted by the model, the trends were different. To match them, the forward binding rate constant,  $kf83$ , was decreased to  $2.5 \text{ nM}^{-1}\text{min}^{-1}$ . Further, it is known that Gal4p binds cooperatively to  $UAS_{GAL}$  sites present on GAL activated promoters<sup>9,10</sup>. We checked the cooperativity of  $GAL10p$ ,  $GAL3p$  and  $GAL80p$  promoters used in the model experimentally by using the promoters to drive EGFP and measured fluorescence output after inducing them with varying concentrations of xylose (**Supplementary Fig.3**). We fit the data to Hill equation and obtained cooperativity values of 2, 1, and 1 for  $GAL10p$ ,  $GAL3p$ , and  $GAL80p$  respectively, which were used for both the feedback models. It is to be noted that the parameter  $kf83$  has been chosen to better reflect the experimental data and that the conclusion drawn from the experiments does not change when  $kf83$  is modified in the model, provided the order of binding interaction strength for the three cases are preserved: Gal3pWT-xylose-Gal80p < Gal3p-Syn4.1-xylose-Gal80p < Gal3p-WT-galactose-Gal80p. The simulations along with experimental data confirm that while at low interaction strengths Gal3p-sugar interaction is inefficient, as the interaction gets stronger, the difference between the two models becomes more prominent with the dual feedback showing increased signal.

#### Single feedback model:

$$\frac{dG3}{dt} = v_{gal} + \alpha G3 * \frac{[G4]^{n3}}{KG3^{n3} + [G4]^{n3}} - kf83 [G3][G80] + kr83[C83] - \gamma_{G3} [G3]$$

$$\frac{dG4}{dt} = \alpha G4 - kf84 [G4][G80] - \gamma_{G4} [G4]$$

$$\begin{aligned} \frac{dG80}{dt} = & \alpha_o G80 + \alpha G80 * \frac{[G4]^{n80}}{KG80^{n80} + [G4]^{n80}} - kf83 [G3][G80] + kr83[C83] - \gamma_{G80} [G80] \\ & - kf84 [G3][G80] + kr83[C84] - \gamma_{G80} [G80] \end{aligned}$$

$$\frac{dGFP}{dt} = \alpha G1 * \frac{[G4]^{n1}}{KG1^{n1} + [G4]^{n1}}$$

$$\frac{dC83}{dt} = kf83 [G3][G80] - kr83[C83] - \gamma_{C83} [C83]$$

$$\frac{dC84}{dt} = kf84 [G4][G80] - kr84[C84] - \gamma_{C84}[C84]$$

**Dual feedback model:**

$$\begin{aligned} \frac{dG3}{dt} = vgal + \alpha G3 * \frac{[G4]^{n3}}{KG3^{n3} + [G4]^{n3}} + \alpha G1 * \frac{[G4]^{n1}}{KG3^{n1} + [G4]^{n1}} - kf83 [G3][G80] + kr83[C83] \\ - \gamma_{G3} [G3] \end{aligned}$$

$$\frac{dG4}{dt} = \alpha G4 - kf84 [G4][G80] - \gamma_{G4}[G4]$$

$$\begin{aligned} \frac{dG80}{dt} = \alpha_o G80 + \alpha G80 * \frac{[G4]^{n80}}{KG80^{n80} + [G4]^{n80}} - kf83 [G3][G80] + kr83[C83] - \gamma_{G80} [G80] - \\ kf84 [G3][G80] + kr83[C84] - \gamma_{G80} [G80] \end{aligned}$$

$$\frac{dGFP}{dt} = \alpha G1 * \frac{[G4]^{n1}}{KG1^{n1} + [G4]^{n1}}$$

$$\frac{dC83}{dt} = kf83 [G3][G80] - kr83[C83] - \gamma_{C83}[C83]$$

$$\frac{dC84}{dt} = kf84 [G4][G80] - kr84[C84] - \gamma_{C84}[C84]$$

#### **Supplementary Note 4: Activation of downstream genes under the synthetic xylose regulon**

It has been shown previously that the GAL regulon differentially regulates hundreds of genes which include not only genes of galactose metabolism (*GAL1*, *GAL7*, *GAL10*) and regulation (*GAL3*, *GAL80*, *GAL4*) but also genes responsible for other cellular functions such as *GCY1*, *FUR4*, *LAP3*, *MTH1*, *PCL10*, *REE1*, etc<sup>11-13</sup>. By amplifying the upstream regions of genes *GCY1*, *LAP3*, *MTH1*, *PCL10*, *FUR4*, and *REE1*, and placing them upstream of *EGFP* we created *Promoter-EGFP-TEFt* constructs. As control, we also included the constitutive promoter *TEF1p* promoter upstream of *EGFP-TEFt*. The constructs were grown in sucrose and tested for fluorescence with or without the regulon. As positive control, the strains were also incubated in galactose, to check the maximum possible induction for these promoters. **Supplementary Fig.6** shows the fluorescence obtained under the conditions tested. Only three of the six promoters, *GCY1p*, *MTH1p*, and *PCL10p* had increased fluorescence with the xylose regulon consistent with fluorescence increase observed when the same genes were induced with galactose. Under these assay conditions, we did not observe activation of the other three promoters even though it has been shown to be upregulated by galactose<sup>13,14</sup>. To check if there is sucrose induced regulation of these genes, we switched the growth medium from sucrose to a mixture of ethanol (3 %) and glycerol (2 %). With the new growth medium, we observed activation of *LAP3p* by both xylose and galactose, suggesting possible sucrose-mediated regulation of *LAP3p*. The other two promoters, *FUR4p* and *REE1p*, probably have weak up-regulation that couldn't be detected by the fluorescence assay. Overall, we show that in the presence of xylose, Gal3p-Syn4.1 controls genes of the GAL regulon that are both strongly and weakly *trans*-activated, similar to galactose-based activation (**Fig. 4G**).

### **Supplementary Note 5: Characterization of expression strengths of *GAL1p/10p* and constitutive promoters in xylose**

To check if there is a difference in expression strengths between *GAL1p/10p* and *TEF1p/TPI1p* results in observed difference in growth rates of XYL-REG and XYL-CONS strain in xylose, we transformed VEG16 strain with either pRS426-GAL1p, pRS426-GAL10p, pRS426-TEF1p or pRS426-TPI1p plasmid along with XYL regulon plasmids (pVEG16\* and pVEG17\*) and compared the fluorescence levels after growing the strains in sucrose along with xylose. To replicate the conditions of growth on xylose, we used high copy plasmids. Since XYL-REG and XYL-CONS strains were grown in 2 % xylose, we checked for fluorescence in 2 % xylose, as well at maximum xylose concentration of 4 %. From **Supplementary Fig.7a**, it can be seen that the fluorescence at 2 % xylose concentration, constitutive promoters have 1.6-fold higher fluorescence than the GAL promoters and at 4 % xylose concentration, the fluorescence levels remain the same. On the contrary, mRNA expression data from RNA-seq analysis reveal mRNA levels of *XYLA\*3* and *XKS1* from XYL-REG to be several folds higher than XYL-CONS (**Supplementary Fig.7b**). It is possible that either increased levels of mRNA doesn't translate completely into protein or presence of sucrose as the growth substrate suppresses GAL regulon resulting in lowered fluorescence of strains carrying pRS426-GAL1p and pRS426-GAL10p plasmids. Either way, the difference in expression strengths of GAL regulated promoters and constitutive promoters alone does not explain the difference in growth rates as increased expression need not directly translate to increased growth rate. In the case of GAL-CONS, though expression of *GAL1,7,10* genes were several folds higher than in GAL-REG, growth rate was lower. Finally, as seen from RNA-seq analysis (**Fig. 6**), the increased expression of *XYLA\*3* and *XKS1* in XYL-REG is not sufficient to explain the observed upregulation of several growth-related pathways.



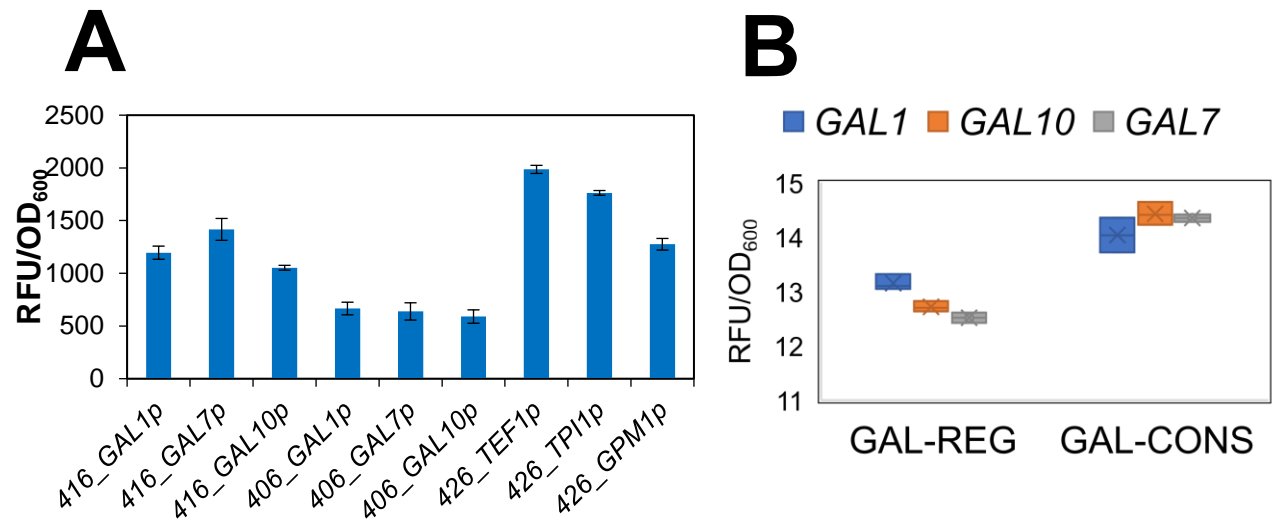

**Supplementary Figure 1:** Comparison of expression strengths of GAL regulated and constitutive promoters when grown in galactose. (A) GAL and constitutive promoters expressing EGFP in single chromosomal copy (406), low copy plasmid (416), and multicopy plasmid (426). (B) Box and whisker plot of normalized log counts per million mapped reads of *GAL1*, *GAL7*, and *GAL10* mRNA in GAL-REG (WT) and GAL-CONS strains. Each data point represents average of three biological replicates  $\pm$  sd.

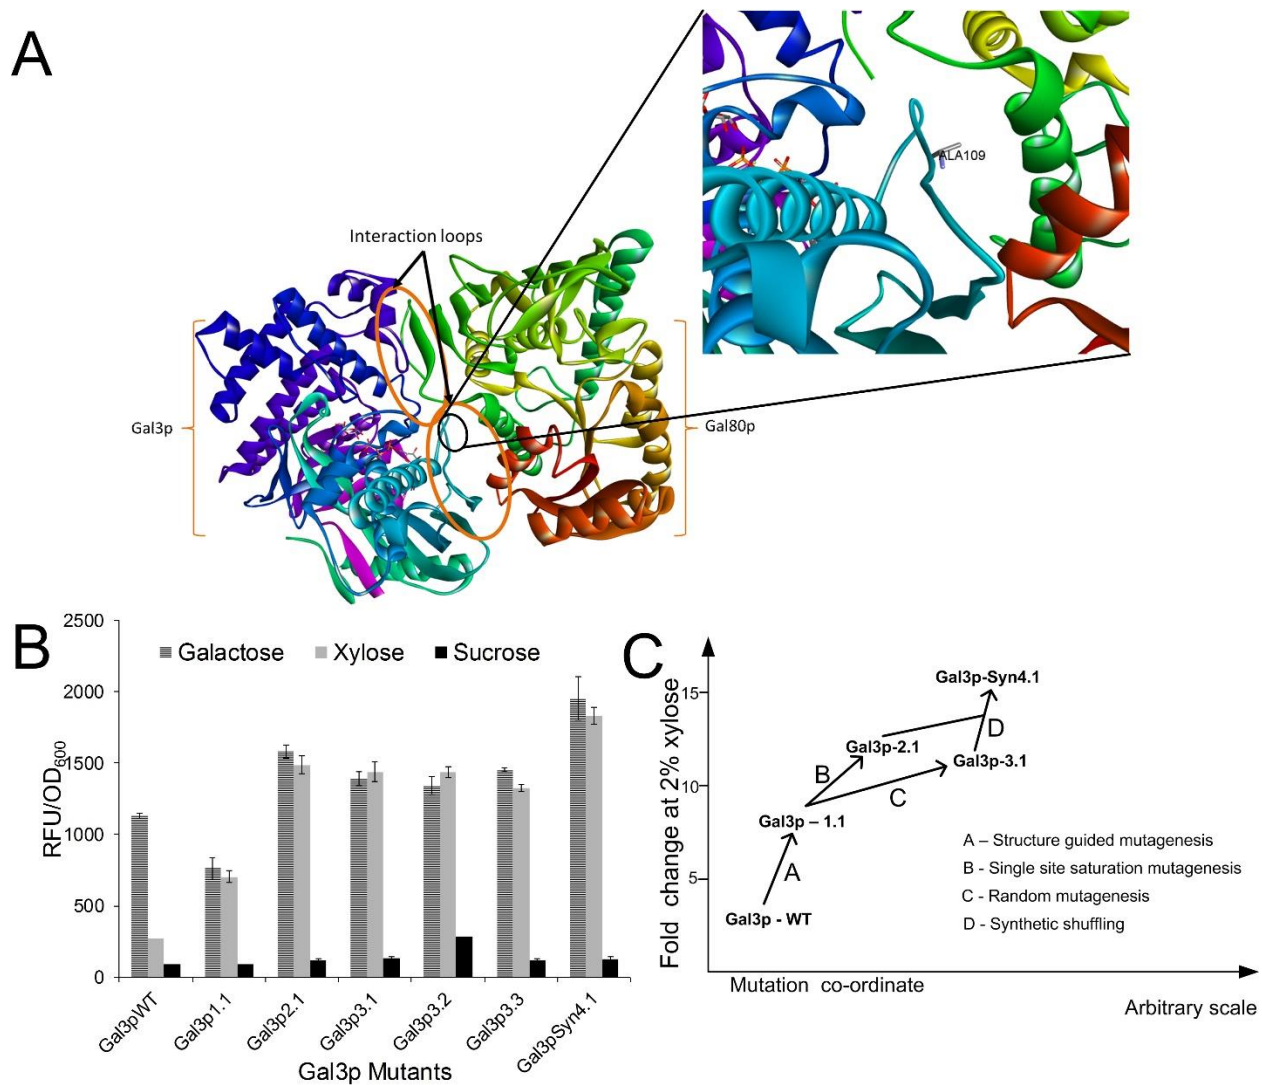

**Supplementary Figure 2: Gal3p-mutagenesis.** (A) Crystal structure of Gal3p with the two interaction loops circled in orange (figure adapted from Lavy T, et al., 2012<sup>3</sup>). The position of A109 residue is zoomed in to show that A109 faces the Gal80p suggesting that mutation to Thr or Val probably increases this interaction and thus increases the strength of GAL regulon activation by xylose. (B) Fluorescence of Gal3p-WT and the best mutants from successive rounds of mutagenesis were incubated with sucrose alone, 2 % xylose or 2 % galactose. (C) Roadmap to the final mutant Gal3p-Syn4.1 and increase in fold change at 2 % xylose with every successive round of mutation. Each data point represents average of biological triplicates  $\pm$  sd.

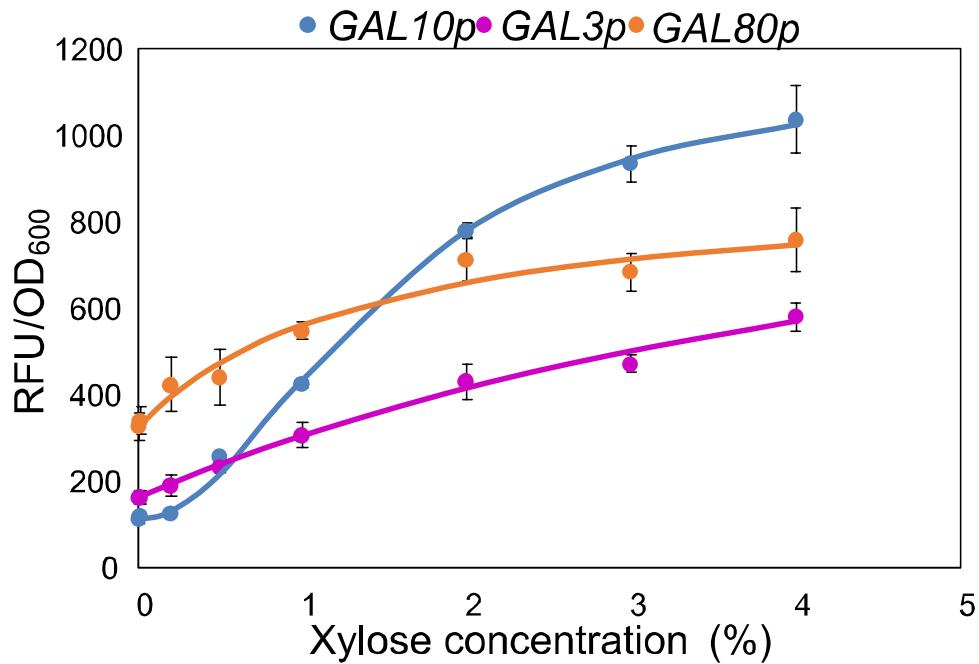

**Supplementary Figure 3:** Fluorescence assay of constructs with *GAL10p*, *GAL3p*, and *GAL80p* promoters driving EGFP expression. Data points represent actual experiments and the lines represent hill curve fits for the data. Each data point represents average of biological triplicates  $\pm$  sd.

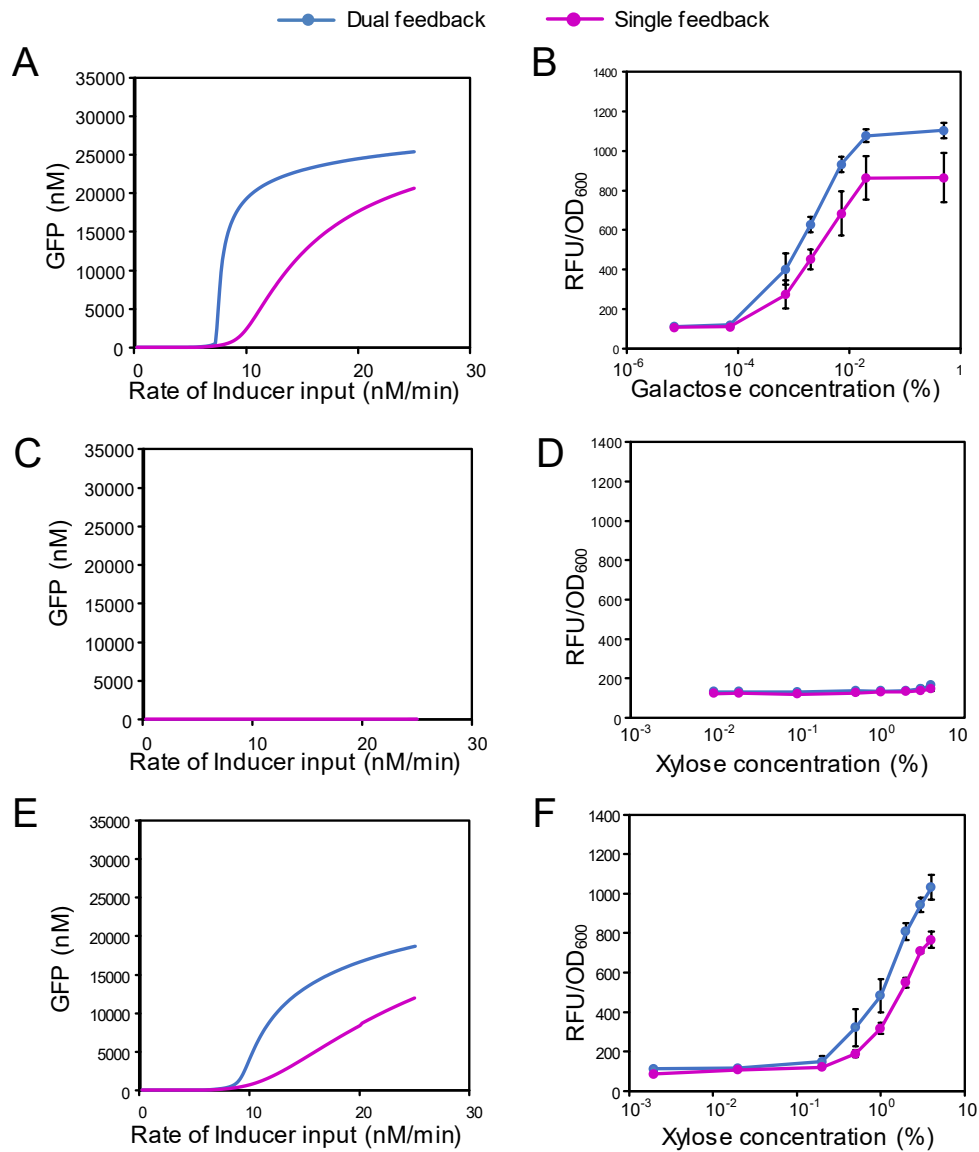

**Supplementary Figure 4:** Comparison of steady state ODE simulation for single and dual feedback models with varying levels of  $kf83$  with experimental data measuring varying interaction strengths of Gal3p-sugar-Gal80p binding. (A & B) Comparison of simulation and experiment for Gal3p-WT-galactose-Gal80p interaction with the model having  $kf83$  of 2.5. (C & D) Comparison of simulation and experiment for Gal3p-WT-xylose-Gal80p interaction with the model having  $kf83$  of 0.1. (E & F) Comparison of simulation and experiment for Gal3p-Syn4.1-xylose-Gal80p interaction with the model having  $kf83$  of 1. Each data point represents average of biological triplicates  $\pm$  sd.

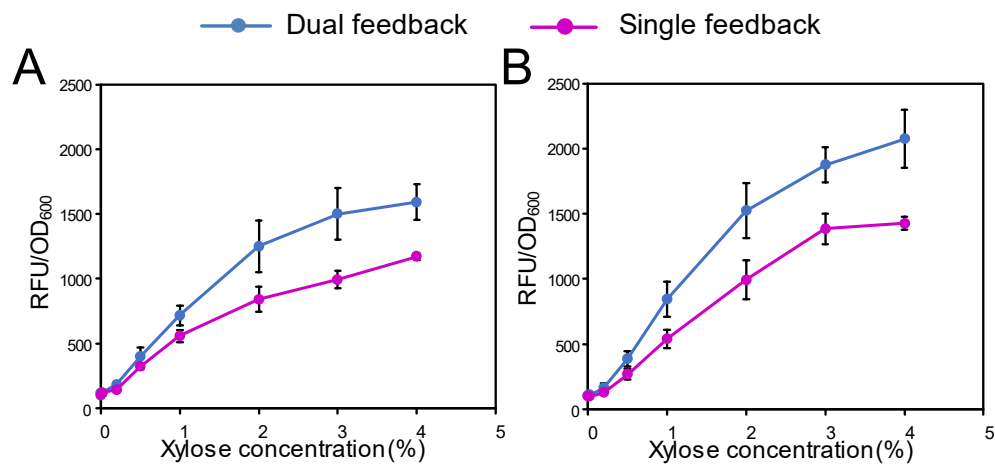

**Supplementary Figure 5:** Increase in sensitivity of dual positive feedback system over single feedback system using (A) *GAL1P-EGFP-T* and (B) *GAL7P-EGFP-T* as reporter constructs. Each data point represents average of biological triplicates  $\pm$  sd.

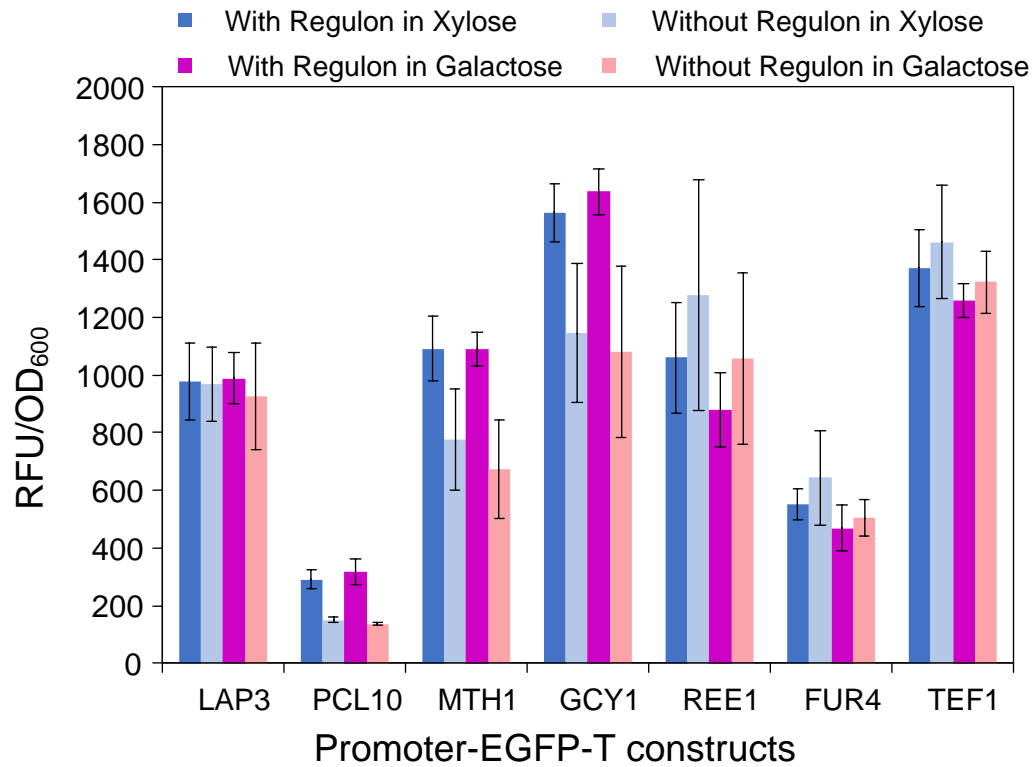

**Supplementary Figure 6:** Some of the promoters that drive the downstream genes of the galactose regulon were used to drive EGFP. Fluorescence was measured in the presence or absence of xylose and galactose regulon when grown in sucrose. Each data point represents average of biological triplicates  $\pm$  sd.

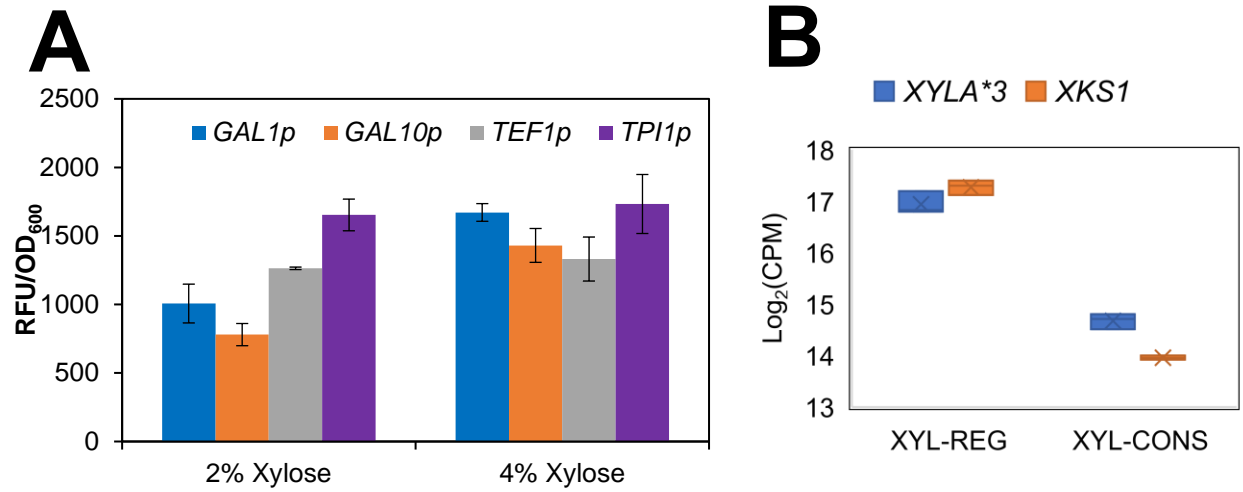

**Supplementary Figure 7:** Comparison of expression strengths of GAL regulated and constitutive promoters when grown in xylose. (A) GAL and constitutive promoters expressing EGFP when grown in sucrose with 2 % or 4 % xylose. (B) Box and whisker plot of normalized log counts per million mapped reads of *XYLA\** and *XKS1* mRNA in XYL-REG and XYL-CONS strains. Each data point represents average of biological triplicates  $\pm$  sd.

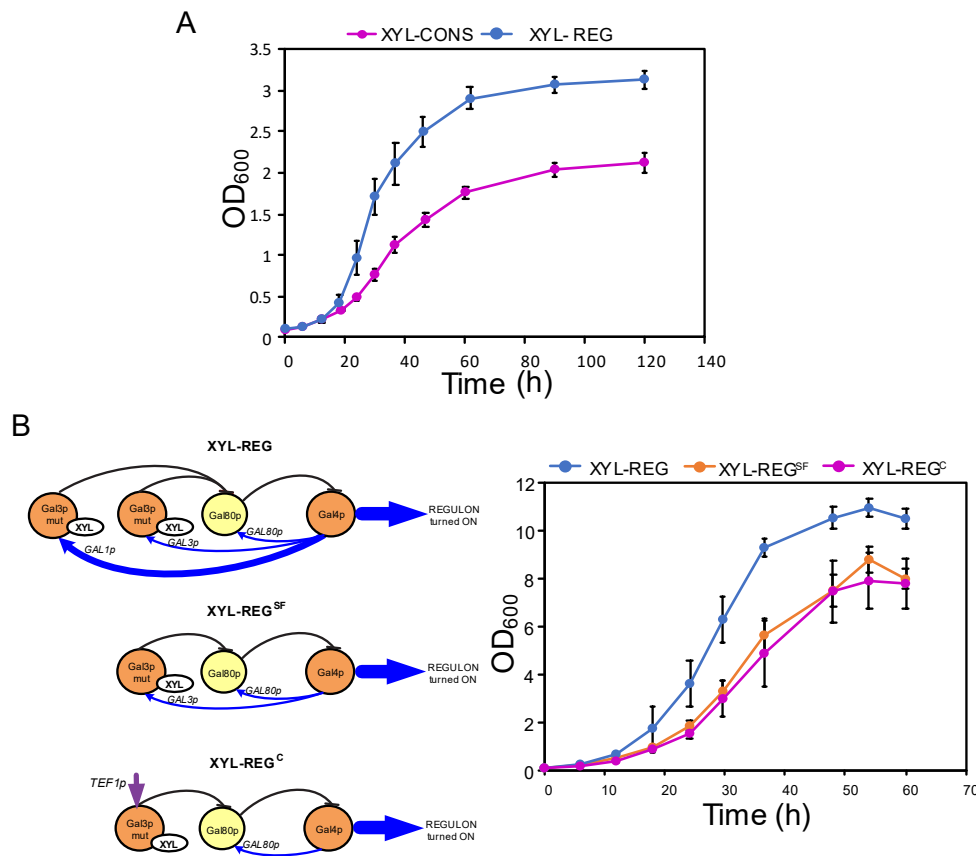

**Supplementary Figure 8:** Growth of engineered strains in xylose. (A) Growth of XYL-REG ( $\mu = 0.12 \text{ h}^{-1}$ ,  $\text{OD}_{\text{max}} \approx 3.2$ ) and XYL-CONS ( $\mu = 0.07 \text{ h}^{-1}$ ,  $\text{OD}_{\text{max}} \approx 2.1$ ) strains in minimal medium supplemented with 2 % xylose. (B) Schematic of the regulon designs (left) and comparison of growth curves (right) in complex medium (YPA + 2% xylose) of dual feedback strain XYL-REG ( $\mu = 0.15 \text{ h}^{-1}$ ,  $\text{OD}_{\text{max}} \approx 11$ ), with single feedback, XYL-REG<sup>SF</sup> ( $\mu = 0.12 \text{ h}^{-1}$ ,  $\text{OD}_{\text{max}} \approx 8$ ), and constitutively active XYL regulon XYL-REG<sup>C</sup> ( $\mu = 0.12 \text{ h}^{-1}$ ,  $\text{OD}_{\text{max}} \approx 8$ ). Each data point represents average of biological triplicates  $\pm$  sd.



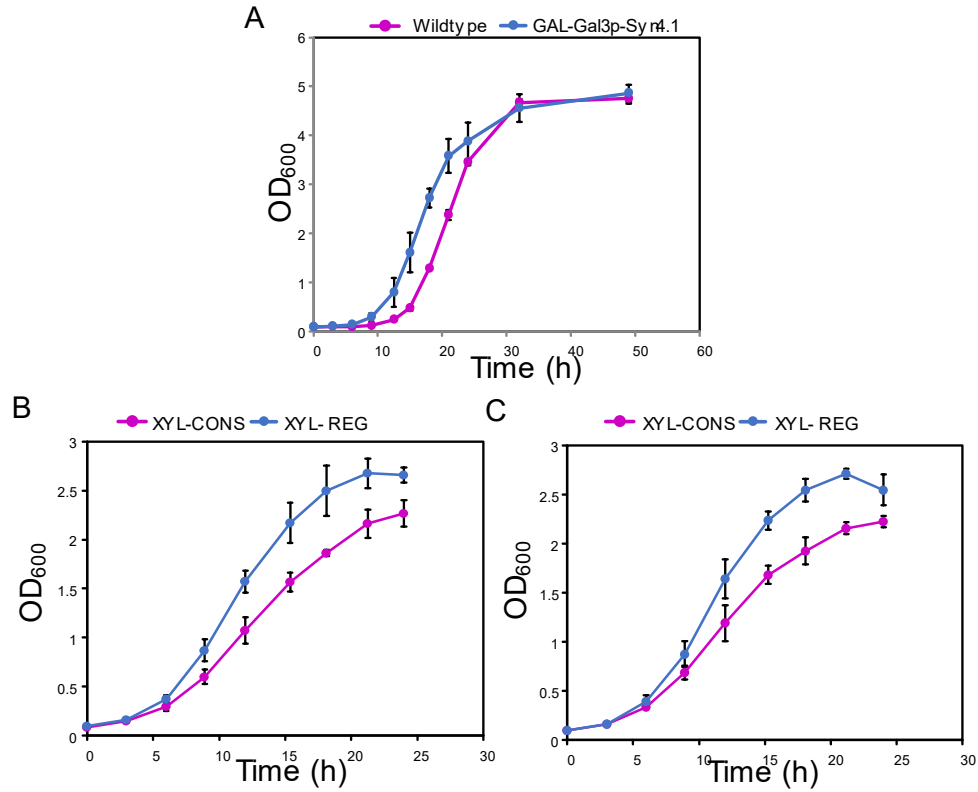

**Supplementary Figure 9:** Growth of strains in inducing and non-inducing sugars. (A) Growth of wildtype and a strain expressing Gal3p-Syn4.1 in a *GAL3Δ* background on 2 % galactose ( $\mu = 0.3 \text{ h}^{-1}$  for both). Growth of strains XYL-REG and XYL-CONS in minimal media supplemented with (B) non-repressing sugar sucrose and (C) repressing sugar glucose. Each data point represents average of biological triplicates  $\pm$  sd.

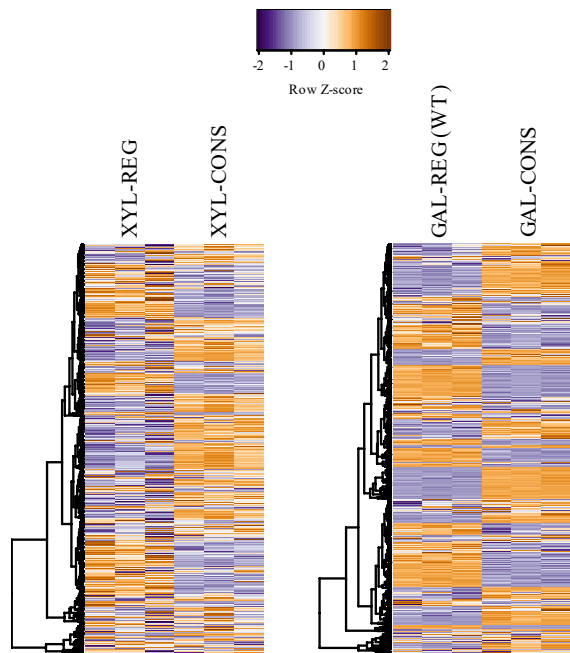

**Supplementary Figure 10:** Hierarchically clustered heatmap of transcriptome profiles of REG vs CONS strains.

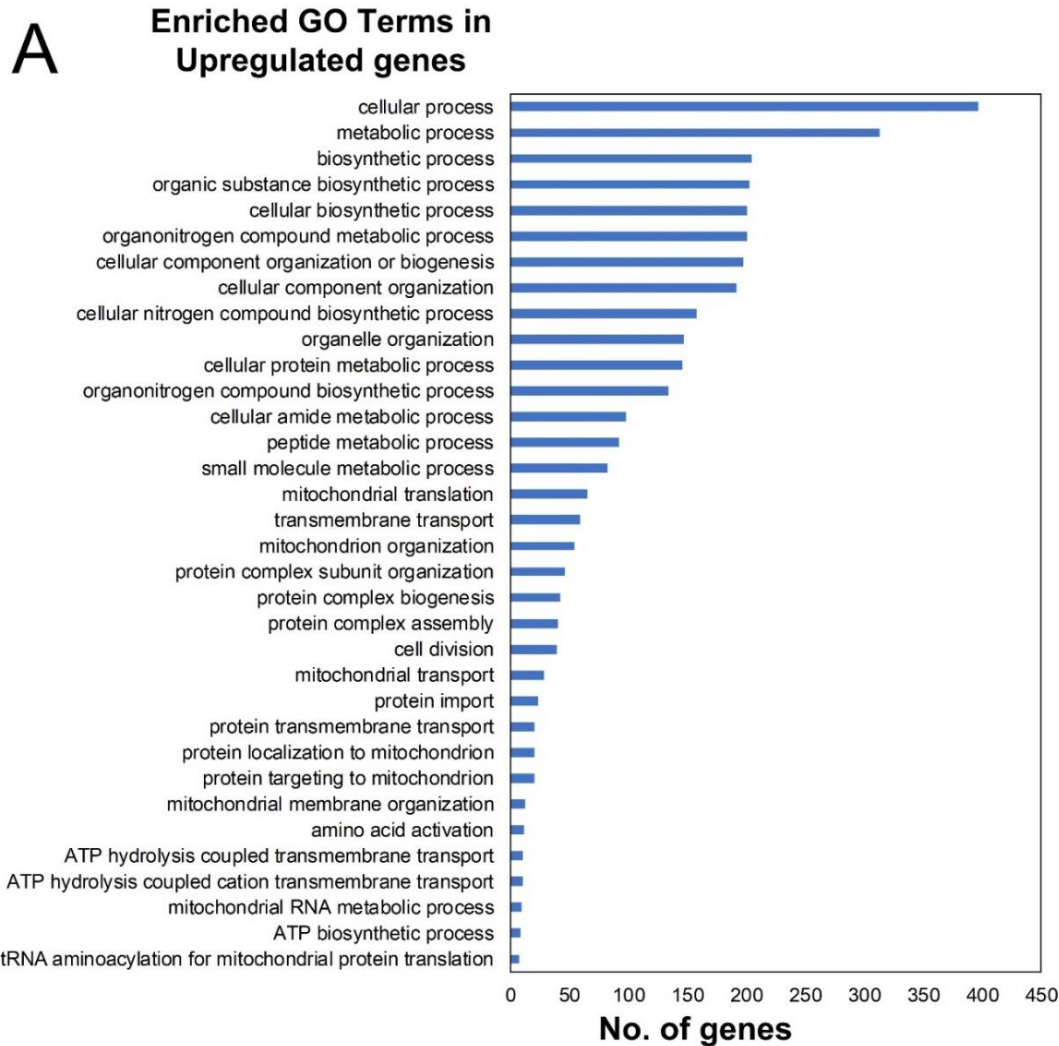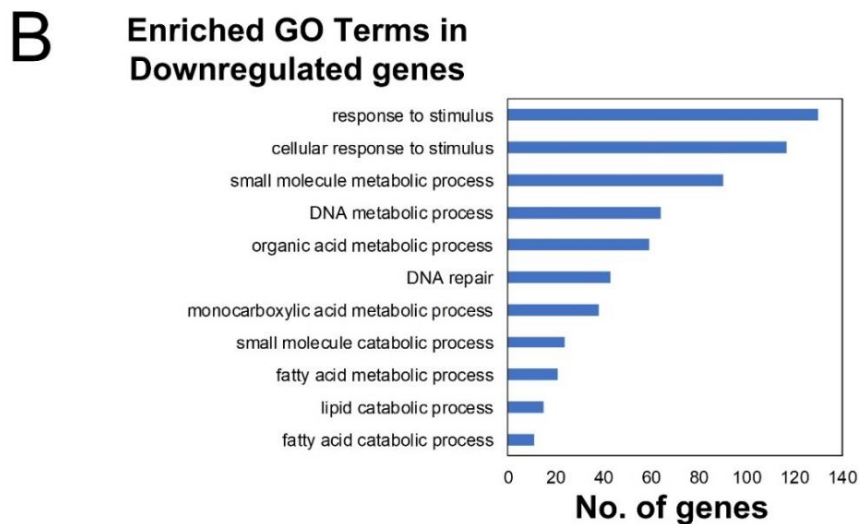

**Supplementary Figure 11:** GO term enrichment analysis of genes that are (A) upregulated in REG strains (B) downregulated in REG strains, both compared to CONS strains.

**Supplementary Table 1:** List of mutations on the Gal3p variants during each round of mutagenesis.

| <b>Mutant name</b> | <b>Mutations</b>                             | <b>Round</b>                 |
|--------------------|----------------------------------------------|------------------------------|
| Gal3p-1.1          | A109T                                        | Interaction loop mutagenesis |
| Gal3p-2.1          | A109V                                        | Site Saturation Mutagenesis  |
| Gal3p-3.1          | K22R, D68N, I77T, C123G, N141S, L394I, A109T | Error prone PCR              |
| Gal3p-3.2          | I271L, L394I, A109T                          | Error prone PCR              |
| Gal3p-3.3          | V69M, L394I, A109T                           | Error prone PCR              |
| Gal3p-Syn4.1       | D68N, V69M, I271L, A109V                     | Synthetic shuffling          |

**Supplementary Table 2:** List of plasmids used.

| <b>Plasmids</b>           | <b>Description</b>                                                                  |
|---------------------------|-------------------------------------------------------------------------------------|
| <b>pCONS-GAL</b>          | <i>pRS426, 2μ ori, URA3, TEF1t-GAL7-GPM1p-ADH1t- GAL10- TP11p-TEF1p –GAL1-HXT7t</i> |
| <b>pVEG7</b>              | <i>pRS426, 2μ ori, URA3, ADH1t-EGFP- GAL1p/GAL10p-KANMX-Hxt7t</i>                   |
| <b>pVEG8</b>              | <i>pRS426, 2μ ori, URA3, GAL3p-GAL3-TEF1t, ADH1t-EGFP- GAL1p/GAL10p-KANMX-HXT7t</i> |
| <b>pVEG11</b>             | <i>pRS426, 2μ ori, URA3, ADH1t- Piromyces_XYLA*3- GAL1p/GAL10p -XKS1-HXT7t</i>      |
| <b>pVEG12</b>             | <i>pRS423, 2μ ori, HIS, ADH1t- TAL1- GAL1p/GAL10p–GAL2-2.1-HXT7t</i>                |
| <b>pVEG13</b>             | <i>pRS423, 2μ ori, HIS, ADH1t- TAL1- TEF1p-TP11p –GAL2-2.1-HXT7t</i>                |
| <b>pVEG15</b>             | <i>pRS426, 2μ ori, URA3, ADH1t- Piromyces_XYLA*3- TEF1p-TP11p -XKS1-HXT7t</i>       |
| <b>pVEG16</b>             | <i>pRS414, CEN ori, TRP, GAL3p-GAL3-TEF1t</i>                                       |
| <b>pVEG17</b>             | <i>pRS415, CEN ori, LEU, GAL1p-GAL3-TEF1t</i>                                       |
| <b>pVEG16*</b>            | <i>pRS414, CEN ori, TRP, GAL3p-GAL3-Syn4.1-TEF1t</i>                                |
| <b>pVEG17*</b>            | <i>pRS415, CEN ori, LEU, GAL1p-GAL3-Syn4.1-TEF1t</i>                                |
| <b>pVEG16<sup>C</sup></b> | <i>pRS414, CEN ori, TRP, TEF1p-GAL3-Syn4.1-TEF1t</i>                                |
| <b>pRS405-GAL2-2.1</b>    | <i>pRS405, no ori, LEU, GAL2p-GAL2-2.1-TEF1t</i>                                    |
| <b>pRS426-GAL1p</b>       | <i>pRS426, 2μ ori, URA3, GAL1p-EGFP-ADH1t</i>                                       |
| <b>pRS426-GAL3p</b>       | <i>pRS426, 2μ ori, URA3, GAL3p-EGFP-ADH1t</i>                                       |
| <b>pRS426-GAL80p</b>      | <i>pRS426, 2μ ori, URA3, GAL80p-EGFP-ADH1t</i>                                      |
| <b>pRS426-GAL7p</b>       | <i>pRS426, 2μ ori, URA3, GAL7p-EGFP-ADH1t</i>                                       |
| <b>pRS426-GAL10p</b>      | <i>pRS426, 2μ ori, URA3, GAL10p-EGFP-ADH1t</i>                                      |
| <b>pRS416-GAL1p</b>       | <i>pRS426, CEN ori, URA3, GAL1p-EGFP-ADH1t</i>                                      |
| <b>pRS416-GAL7p</b>       | <i>pRS426, CEN ori, URA3, GAL7p-EGFP-ADH1t</i>                                      |
| <b>pRS416-GAL10p</b>      | <i>pRS426, CEN ori, URA3, GAL10p-EGFP-ADH1t</i>                                     |
| <b>pRS406-GAL1p</b>       | <i>pRS406, URA3, GAL1p-EGFP-ADH1t</i>                                               |
| <b>pRS406-GAL7p</b>       | <i>pRS406, URA3, GAL7p-EGFP-ADH1t</i>                                               |
| <b>pRS406-GAL10p</b>      | <i>pRS406, URA3, GAL10p-EGFP-ADH1t</i>                                              |

|                      |                                                               |
|----------------------|---------------------------------------------------------------|
| <b>pRS426-REE1p</b>  | <i>pRS426, 2<math>\mu</math> ori, URA3, REE1p-EGFP-ADH1t</i>  |
| <b>pRS426-LAP3p</b>  | <i>pRS426, 2<math>\mu</math> ori, URA3, LAP3p-EGFP-ADH1t</i>  |
| <b>pRS426-PCL10p</b> | <i>pRS426, 2<math>\mu</math> ori, URA3, PCL10p-EGFP-ADH1t</i> |
| <b>pRS426-FUR4p</b>  | <i>pRS426, 2<math>\mu</math> ori, URA3, FUR4p-EGFP-ADH1t</i>  |
| <b>pRS426-MTH1p</b>  | <i>pRS426, 2<math>\mu</math> ori, URA3, MTH1p-EGFP-ADH1t</i>  |
| <b>pRS426-GCY1p</b>  | <i>pRS426, 2<math>\mu</math> ori, URA3, GCY1p-EGFP-ADH1t</i>  |
| <b>pRS426-TEF1p</b>  | <i>pRS426, 2<math>\mu</math> ori, URA3, TEF1p-EGFP-ADH1t</i>  |
| <b>pRS426-TPI1p</b>  | <i>pRS426, 2<math>\mu</math> ori, URA3, TPI1p-EGFP-ADH1t</i>  |
| <b>pRS426-GPM1p</b>  | <i>pRS426, 2<math>\mu</math> ori, URA3, GPM1p-EGFP-ADH1t</i>  |

**Supplementary Table 3:** List of strains used.

| <b>Strains</b>              | <b>Description</b>                                                             |
|-----------------------------|--------------------------------------------------------------------------------|
| <b>W303-1a (GAL-REG)</b>    | <i>MATa leu2-3,112 trp1-1 can1-100 ura3-1 ade2-1 his3-11,15</i>                |
| <b>VEG6</b>                 | <i>W303-1a, ΔGAL3</i>                                                          |
| <b>VEG16</b>                | <i>W303-1a, ΔGAL3; ΔGRE3; ΔGAL1; ΔGAL7; ΔGAL10</i>                             |
| <b>VEG20</b>                | <i>W303-1a, ΔGAL3; ΔGRE3; ΔGAL1; ΔGAL7; ΔGAL10; LEU::GAL2p-GAL2-2.1-TEFt</i>   |
| <b>CONS-GAL</b>             | <i>W303-1a, ΔGAL4; transformed with pCONS-GAL</i>                              |
| <b>CONS-GAL-GAL4</b>        | <i>W303-1a, ΔGAL3; ΔGRE3; ΔGAL1; ΔGAL7; ΔGAL10; transformed with pCONS-GAL</i> |
| <b>XYL-CONS</b>             | VEG16 transformed with pVEG15, pVE13, pRS41416 and pRS415                      |
| <b>XYL-REG</b>              | VEG16 transformed with pVEG11, pVE12, pVEG16* and pVEG17*                      |
| <b>XYL-REG<sup>SF</sup></b> | VEG16 transformed with pVEG11, pVE12, pVEG16* and pRS415                       |
| <b>XYL-REG<sup>C</sup></b>  | VEG16 transformed with pVEG11, pVE12, pVEG16 <sup>C</sup> and pRS415           |
| <b>GAL-Gal3p-Syn4.1</b>     | VEG6 transformed with pVEG16 <sup>Syn4.1</sup>                                 |
| <b>VEG21</b>                | <i>W303-1a, ΔGAL3; ΔGRE3; ΔGAL1; ΔGAL7; ΔGAL10; URA3::GAL10p-EGFP-TEFt</i>     |
| <b>VEG22</b>                | <i>W303-1a, ΔGAL3; ΔGRE3; ΔGAL1; ΔGAL7; ΔGAL10; URA3::GAL1p-EGFP-TEFt</i>      |
| <b>VEG23</b>                | <i>W303-1a, ΔGAL3; ΔGRE3; ΔGAL1; ΔGAL7; ΔGAL10; URA3::GAL7p-EGFP-TEFt</i>      |

**Supplementary Table 4:** List of primers used

| <b>Primer Name</b>               | <b>Primer Sequence</b>                                                      |
|----------------------------------|-----------------------------------------------------------------------------|
| <b>Gene deletion primers</b>     |                                                                             |
| For-Ura3-Gal4pend                | cgatgcacagttgaagtgaacttgcgggggttttcagtatgtagcttgccctgctccc                  |
| Rev-Ura3-Gal4pend                | gtgcaattaattttcctattgttacttcgggccttttccactggatggcggcgtagt                   |
| F-Gal4p-Ura3removal              | ttgaagtgaacttgcgggggttttcagtatgaaaaaggcccgaagtaacaataggaaaa                 |
| R-Gal4p-Ura3removal              | ttttcctattgttacttcgggccttttcatactgaaaaaccccgaagttcacttcaa                   |
| For-Ga4p-seq                     | agatcagaggttacatggcc                                                        |
| Rev-Gal4p-seq                    | tccgcgcctttgagacagc                                                         |
| Forward Gal3/CaUra3              | ttttactgaaacgtatataatcatcataagcgacaagtgagctttctcaggtatagtatg                |
| Reverse Gal3/CaUra3              | cttaaaatagctccgcggatgctagatttctacgagtcataactataggagaccggcag                 |
| Forward Gal3/CaUra3 Removal      | ttttactgaaacgtatataatcatcataagcgacaagtgatagactcgt                           |
| Reverse Gal3/CaUra3 Removal      | cttaaaatagctccgcggatgctagatttctacgagtcataacttctgctg                         |
| Forward Sequencing Gal3          | aaagaatgaaatcgccatgccaagcc                                                  |
| Reverse Sequencing Gal3          | taaacggaaatggcgggacattta                                                    |
| Forward Gal1,7,10/CaUra3         | caggcattagtgctttataagcataagaagttgtggcgagtatgaggtcgctcttattg                 |
| Reverse Gal1,7,10/CaUra3         | tccaaaacgcagcgggtgaaagcatatcaagaattttgcttaatgcaggtaaacctggc                 |
| Forward Gal1,7,10/CaUra3 Removal | caggcattagtgctttataagcataagaagttgtggcgagacaaaattc                           |
| Reverse Gal1,7,10/CaUra3 Removal | tccaaaacgcagcgggtgaaagcatatcaagaattttgtctcggcacaac                          |
| Forward Sequencing Gal1,7,10     | aacataggtgcaggatttcc                                                        |
| Reverse Sequencing Gal1,7,10     | acaaagggttctcgtagagt                                                        |
| Forward GRE3/CaUra3              | cgaagttactacttctagggggcctatcaagtaaactgtatgaggtcgctcttattg                   |
| Reverse GRE3/CaUra3              | tatacagcatcggaatgagggaaatttgtcatatcgtcgttaatgcaggtaaacctggc                 |
| Forward GRE3/CaUra3 Removal      | cgaagttactacttctagggggcctatcaagtaaactcgacgatatg                             |
| Reverse GRE3/CaUra3 Removal      | tatacagcatcggaatgagggaaatttgtcatatcgtcagtaatttac                            |
| Forward Sequencing GRE3          | ggattaaaaggagcccaag                                                         |
| Reverse Sequencing GRE3          | gtcaaccatacaagagatga                                                        |
| <b>Primers for pCONS-GAL</b>     |                                                                             |
| F-Teft-SacI-pRS426end            | tgattacgccaagcgcgcaattaaccctcactaaagggaacaaaagctggagctctggatggcggcgtagtatac |
| R-Teft-Gal7end                   | gattcattatctacaagactgtaagacaataaaaagattcttgtttca                            |
| F-Gal7-Teftend                   | tgaaaacaagaatcttttattgtcttacagcttttagataatgaatc                             |
| R-Gal7-GPM1end                   | caaacaaacacacatattacaataatgactgctgaagaatttgattttc                           |
| F-GPM1-Gal7end                   | gaaaaatcaaattctcagcagtcattattgtaatatgtgtgtttgtttg                           |
| R-GPM1-NotI-ADH1end              | tgaccacacctctaccggcagcggccgctgcaatgtatgactttaagatt                          |
| F-ADH1t-NotI-GPM1end             | aatcttaaagtcatactgagcggcggcgtgcccgttagaggtgtgttca                           |
| R-ADH1t-Gal10end                 | caagattgtctacagatttctgaggcggccacttctaataagcgaa                              |
| F-Gal10-ADH1end                  | ttcgttatttagaagtggcggcctcaggaaaaactgtagacaattctg                            |
| R-Gal10-TPIpend                  | caaaaaacacatacataaactaaaaatgacagctcagttcaaaagtgaaa                          |
| F-TPIp-Gal10end                  | tttactttgtaactgagctgcatttttatgtatgtgtttttg                                  |
| R-TEFp-Gal1end                   | cttctctgaatgagatttagctattttgtaattaaaacttagattagat                           |



|                                                              |                                                                        |
|--------------------------------------------------------------|------------------------------------------------------------------------|
| F-Gal1-TEFpend                                               | atctaactaagttttaattacaaaatgactaaatctcattcagaagaag                      |
| R-Gal1-Hxt7tend                                              | aaagtgtctaatgagtcagttattttataattcatatagacagctgcc                       |
| F-Hxt7t-Gal1end                                              | gggcagctgtctatatgaattataaaaactgactcattagacacttt                        |
| R-Hxt7t-BamHI-pRS426end                                      | cgaggtcgacggatcgaataagctgatcgaattcctgcagccgggggatccgatcacgctctaattgtgc |
| <b>Primers for selection and screening plasmid</b>           |                                                                        |
| F_Gal3prom_gene_BamHI                                        | acgtgaggatccgcataaacaccatcagcctc                                       |
| R_TEFt_NotI_LE                                               | gactgagcggccgctggatggcggcgttagtat                                      |
| Reverse Gal3_TEFt end                                        | gttcttgaaaacaagaatcttttattgacccaactgtttctttatagagtgaagag               |
| Forward TEFt_Gal3 end                                        | ctcttacctctataaagaacaagtgggacaataaaaagattctgtttcaagaac                 |
| F_Hxt7_BamHIend                                              | agctcggatcctttgcgaacacttttataatt                                       |
| R_Hxt7_KanRend                                               | catttgatgctcgatgagtttttaataactgactcattagacacttttgaagcg                 |
| F_kanR_Hxt7end                                               | cgctcaaaaagtgtctaatgagtcagttattagaaaaactcagcgcataaatg                  |
| Reverse KanR_Gal1p end                                       | gtaagaattttgaaattcaatataaatgagccatattcaacgggaacgtcttg                  |
| Forward Gal1p_KanR end                                       | caagacgttcccgttgaatatggctcatttatattgaatttcaaaaattcttac                 |
| Reverse Gal1p_GFP_ADH1t end                                  | accagtgaataattctcacttttagacattatagttttctccttgacgttaaag                 |
| Forward GFP_ADH1t_Gal1p end                                  | cttaacgtcaaggagaaaaactataatgtctaaaggtgaagaattattcactggt                |
| R_ADH1t_GFP_Sallend                                          | agatcgtcactgccgtagaggtgtggtca                                          |
| <b>Primers for GAL2-2.1mutagenesis and cloning in pRS405</b> |                                                                        |
| For_Gal2prom_XhoIend                                         | agttgcctcgagttgcctcaggaagcaccggcgctc                                   |
| RevGal2prom_Gal2end                                          | gcatattgttctcctcaactgccattatgaaagaatttttttatta                         |
| F_Gal2_Gal2promend                                           | taataaaaaaataattctttcataatggcagttgaggagaacaatatgc                      |
| Gal2*-F-301-314                                              | gcagagttagatcggatcatggccggatagaaagctgaacgacggcctggcgcgatcgtcc          |
| Gal2*-R-301-314                                              | ggacgcacgccagcccgtcgttcagctctataccggccatgatccgatctaactctgc             |
| Gal2*-F-435                                                  | tcttctaaaggtgccggttaactgtacgattgtctttacctgtt                           |
| Gal2*-R-435                                                  | aacaggtaaagacaatcgtacagttaccggcacctttagaaga                            |
| Gal2*-F-50                                                   | atgaattgaaagccggtgagtcagggcctgaaggctcccaaagtgttct                      |
| Gal2*-R-50                                                   | aggaaactttgggagccttcaggcctgactcaccggctttcaattcat                       |
| Gal2*-F-280                                                  | tgaggtgaataaggtagaagacgccaagcttccattgctaagtctaaca                      |
| Gal2*-R-280                                                  | tgftagacttagcaatggaaagcttggcgtctctaccttattcacctca                      |
| Gal2*-F-392                                                  | tggactgtcgaaaacttggggcgtcgtaaatgttacttttgggcgtgc                       |
| Gal2*-R-392                                                  | gcagcgcctcaaaagtaaacatttacgacgcccgaagtttcgacagtcca                     |
| Gal2*-F-89                                                   | cggctcatgtttggctgggataccggfactatttctgggtttgtgtcc                       |
| Gal2*-R-89                                                   | ggacaacaaccagaaatagtaccggtatccagccaaacatgaagccc                        |
| Reverse Gal2_TEFt end                                        | agaaattcgcttattagaagtggcgcgccttattctagcatggccttgtaccaggtt              |
| Forward TEFt_Gal2 end                                        | aaaccgtgtacaaggccatgctagaataaggcgcgcacttctaaataagcgaatttct             |
| Reverse TEFt_NotI end                                        | acgtgcggccgatctatattaccctgttatccc                                      |
| <b>Primers for mutagenesis</b>                               |                                                                        |
| Structure guided loop mutagenesis                            |                                                                        |
| F-K93-loop1mut                                               | aaattttagacgaaaaaatccatcattacctaacaatgcggaccct                         |
| R-K93-loop1-mut                                              | agggtccgatttgttaaggtaatggatggatttttctgctaaaattt                        |
| F-S115-loop1mut                                              | gaatggtcgaattactttaatgcggactacatgtggcac                                |
| R-S115-loop1mut                                              | gtgccacatgtagtccgatttaagtaattcgaccattc                                 |
| F-K345loop2-mut                                              | ttgaacgttactcaagatgctacaattggtagaagaatcttctcgagg                       |
| R-K345-loop2-mut                                             | cctcgagaaagattcttaccattgtagcatcttgagtaaactgtcaa                        |
| F-K381loop2-mut                                              | ctatatcaagagctaaacacgtttactccgaatccttaagg                              |
| R-K381-loop2-mut                                             | ccttaaggattcggagtaaacgtgttagctctttgatatag                              |

|                                                           |                                                             |
|-----------------------------------------------------------|-------------------------------------------------------------|
| Site saturation mutagenesis at A109                       |                                                             |
| For 109A mut                                              | cctacatgnnktagatccgtctgtgtcg                                |
| Rev 109A mut                                              | ggatctatmnnccatgttaggaacctctaaagg                           |
| Errorprone PCR of GAL3                                    |                                                             |
| F_G3gene_G3p end                                          | gagaaaataaaaagtaaaaaggtagggcaacacatagt                      |
| R_G3p_G3gene end                                          | actatgtgtgccctacctttttactttttttctc                          |
| Primers for synthetic shuffling                           |                                                             |
| F_Mut22                                                   | tttcgaacaaaracatttagcgggtgtaga                              |
| R_Mut22                                                   | tctacaaccgctaataatgtytttgtcgaaa                             |
| F_Mut68_77                                                | gccattagccatratrtggatagctttgcgagttaaaaytttagacg             |
| R_Mut68_77                                                | cgtctaaarttttaactgcgcaaaagcatatccaytyaatggctaattggc         |
| F_Mut_123 141                                             | akgcggactacatgtggcacattcatacttgaaaaaaattgctccggaagattartaa  |
| R_Mut_123 141                                             | ttaytaaatctttccggagcaatTTTTTcaagtatgaatgtgccacatgtagtccgcmt |
| F_Mut_271                                                 | aatttaagagtawtagaggtaaacagttg                               |
| R_Mut_271                                                 | caactgttacctctawtactcttaaat                                 |
| F_Mut_394                                                 | gtttactccgaatccwtaagggtgctta                                |
| R_Mut_394                                                 | taagcaccttawggattcggagtaaac                                 |
| <b>Primers for cloning Promoter-EGFP-ADH1t constructs</b> |                                                             |
| F-Gal1p-BamHIend                                          | acgtgaggatccacatggcattaccacatata                            |
| F-Gal2p-BamHIend                                          | acgtgaggatccactccaattaaatgcggtag                            |
| F-Gal4p-BamHIend                                          | acgtgaggatcctgacggcgacacagagatg                             |
| F-Gal7p-BamHIend                                          | acgtgaggatccgacggtagcaacaagaatat                            |
| F-Gal10p-BamHIend                                         | acgtgaggatccatcgcttcgctgattaatta                            |
| F-Gal80p-BamHIend                                         | acgtgaggatcctatacccctttctctctcc                             |
| F-GCY1P-BamHIend                                          | acgtgaggatccatggagtgtataagaattg                             |
| R-Gal1P-GFPend                                            | tgaataattcttcaccttagacattatagtttttctccttgacgttaa            |
| R-Gal2P-GFPend                                            | tgaataattcttcaccttagacattatgaaagaatttttttatta               |
| R-Gal3P-GFPend                                            | tgaataattcttcaccttagacatactatggttgccctaccttttac             |
| R-Gal4P-GFPend                                            | tgaataattcttcaccttagacatcttcaggaggtgcttctctgtc              |
| R-Gal7P-GFPend                                            | tgaataattcttcaccttagacattttgagggaatattcaactgt               |
| R-Gal10P-GFPend                                           | tgaataattcttcaccttagacatttatattgaattttcaaaaattcttac         |
| R-Gal80P-GFPend                                           | tgaataattcttcaccttagacatgacgggagtggaagaacgggaaac            |
| R-GCY1P-GFPend                                            | tgaataattcttcaccttagacattttctatcttaatttagaatgag             |
| F-GFP-Gal1Pend                                            | ttaacgtcaaggagaaaaactataatgtctaaagggtgaagaattattca          |
| F-GFP-Gal2Pend                                            | taataaaaaaataatctttcataatgtctaaagggtgaagaattattca           |
| F-GFP-Gal3Pend                                            | gtaaaaaaggtagggcaacacatagtagtctaaagggtgaagaattattca         |
| F-GFP-Gal4Pend                                            | gcagagagaagcaagcctcctgaaagatgtctaaagggtgaagaattattca        |
| F-GFP-Gal7Pend                                            | acagttgaatattccctcaaaaatgtctaaagggtgaagaattattca            |
| F-GFP-Gal10Pend                                           | gtaagaattttgaaaattcaatataaatgtctaaagggtgaagaattattca        |
| F-GFP-Gal80Pend                                           | gtttcccgttcttccactcccgtcatgtctaaagggtgaagaattattca          |
| F-GFP-GCY1Pend                                            | ctcattactaaattaagatagaaaaatgtctaaagggtgaagaattattca         |
| F-TEF1p-BamHIend                                          | acgtgaggatccgccgtaccactcaaaacac                             |
| R-TPIp-BamHIend                                           | acgtgaggatccctacttattcccttcgagat                            |
| R-TEF1P-GFPend                                            | tgaataattcttcaccttagacattttgtaattaaaacttagattagat           |
| R-TPIP-GFPend                                             | tgaataattcttcaccttagacatttttagttatgtatggtttttgtagtt         |
| F-GFP-TEF1end                                             | atctaactaagtttaattacaaaatgtctaaagggtgaagaattattca           |
| F-GFP-TPIend                                              | aactacaaaaaacacatacataaactaaaaatgtctaaagggtgaagaattattca    |
| F-FUR4-BamHIend                                           | agctgaggatccggatacctattctgacatgat                           |

|                                                                                      |                                                                |
|--------------------------------------------------------------------------------------|----------------------------------------------------------------|
| F-LAP3-BamHIend                                                                      | agctgaggatccagcactcatgctttctgtaca                              |
| F-MTH1-BamHIend                                                                      | agctgaggatcccactaaaacgatcagcaaatgg                             |
| F-PCL10-BamHIend                                                                     | agctgaggatcccgatgactgtacggtaaggtc                              |
| F-REE1-SacIend                                                                       | agctgagagctcagatagtacaactacaaactat                             |
| R-FUR4-GFPend                                                                        | accagtgaataattcttcacctttagacattattccctcctattcttattatgcgtagga   |
| R-LAP3-GFPend                                                                        | accagtgaataattcttcacctttagacattcttttaaaacaatttggtgctcgtaa      |
| R-MTH1-GFPend                                                                        | accagtgaataattcttcacctttagacattcctttgagtggtgtactctatgcgttcg    |
| R-PCL10-GFPend                                                                       | accagtgaataattcttcacctttagacatttgcaagtaactattgcgcatggaata      |
| R-REE1-GFPend                                                                        | accagtgaataattcttcacctttagacattggtttgtaattatctgtttgatgga       |
| F-GFP-FUR4end                                                                        | tcctacgcataataagaataggagggaataatgtctaaagggtgaagaattattcactggt  |
| F-GFP-LAP3end                                                                        | ttacgagcaccacaaattgttttaaaaagaatgtctaaagggtgaagaattattcactggt  |
| F-GFP-MTH1end                                                                        | cgaacgcatagagtacacacactcaaaaggaatgtctaaagggtgaagaattattcactggt |
| F-GFP-PCL10end                                                                       | tattccatgcgcaaatagattactgcaaaatgtctaaagggtgaagaattattcactggt   |
| F-GFP-REE1end                                                                        | tccatcaacaagataaattaccaaacacaatgtctaaagggtgaagaattattcactggt   |
| <b>Primers for cloning XYLA*3 and XKS1 under GAL1/10 and TEF1p/TPI1p promoters</b>   |                                                                |
| F_Hxt7t_BamHIend                                                                     | ctagctcggatcctttgcgaacacttttataatt                             |
| R_Hxt7_XYLA_end                                                                      | tacgagctattatcgcgatgatcaataaaaataactgactcattagacacttttgaa      |
| F_XYLA_Hxt7_end                                                                      | ttcaaaaagtgctaatgagtcagttattttattgatacatcgcgataatagcctcgt      |
| R_XYLA_Gal1p_end                                                                     | aaagtaagaattttgaaaattcaatataaatggctaaagaatattccctcaaattcaa     |
| R_XYLA_TEF1p_end                                                                     | tagcaatctaactaagttttaattacaaaatggctaaagaatattccctcaaattcaa     |
| F_Gal1p_XYLA_end                                                                     | ttgaattgagggaatattcttttagccatttatattgaattttcaaaaattcttacttt    |
| F_TEF1p_XYLA_end                                                                     | ttgaattgagggaatattcttttagccattttgaattaaacttagattagattgcta      |
| R_TEF1p_TPI1p_end                                                                    | atataatctcgaagggaataagtaggccgtaccacttcaaacaccaag               |
| F_TPI1p_TEF1_end                                                                     | ctgggtgtttgaaagtggtacggcctacttattccctcagattatat                |
| R_Gal1p_XKS1_end                                                                     | tgtctgtctgaattactgaacacacattatagtttttctcctgacgttaaaagt         |
| F_XKS1_Gal1p_end                                                                     | atacttaacgtcaaggagaaaaactataatgtgtgttcagtaattcagagacagaca      |
| R_TPI1p_XKS1_end                                                                     | gtctctgaattactgaacacacatttttagttatgtatgtgtttttg                |
| F_XKS1_TPI1p_end                                                                     | caaaaaacacatacataaactaaaatgtgtgttcagtaattcagagac               |
| R_XKS1_ADH1tend                                                                      | agaaatcgttatttagaagtgccgccttagatgagagctttccagttcgttaa          |
| F_ADH1t_XKS1end                                                                      | ttaagcgaactggaaaagactctcatctaagcgcgccacttcaataaagcgaattct      |
| R_ADH1t_Sallend                                                                      | acgtacgtcactgaccacactctaccgca                                  |
| <b>Primers for cloning GAL2-2.1 and TAL1 under GAL1/10 and TEF1p/TPI1p promoters</b> |                                                                |
| F-Hxt7t-XhoIend                                                                      | ctctagctcagtcctttgcgaacactttt                                  |
| R-ADH1t-NotIend                                                                      | ctgcatgcggccgctgccggtagaggtgtggtcaataaga                       |
| F-Tal1-Hxt7end                                                                       | aaagtgtctaatgagtcagttatttttaagcggtaactttctttcaatc              |
| R-Hxt7-tal1end                                                                       | gattgaaaagaaagtaccgcttaaaaataactgactcattagacacttt              |
| F-Gal1-10P-Tal1end                                                                   | gtttcttttgagctggttcagacatttatattgaattttcaaaaattctt             |
| R-Tal1-Gal1-10Pend                                                                   | aagaattttgaaaattcaatataaatgtctgaaccagctcaaaagaac               |
| F-Gal2.1-Gal1-10Pend                                                                 | ttaacgtcaaggagaaaaactataatggcagttgaggagaacaatatgc              |
| R-Gal1-10P-Gal2.1end                                                                 | gcatattgtctcctcaactgccattatagttttctccttgacgttaa                |
| F-Tef1p-Tal1end                                                                      | gtttcttttgagctggttcagacattttgaattaaacttagattagat               |
| R-Tal1-TEF1pend                                                                      | atctaactaagtttaattacaaaatgtctgaaccagctcaaaagaac                |
| F-Gal2.1-TPI1end                                                                     | caaaaaacacatacataaactaaaatggcagttgaggagaacaatatgc              |
| R-TPI1p-Gal2.1end                                                                    | gcatattgtctcctcaactgccatttttagttatgtatgtgtttttg                |

**Supplementary Table 5:** List of constants used in single and dual feedback models

| Parameter      | Description                                                  | Units                             | Values |
|----------------|--------------------------------------------------------------|-----------------------------------|--------|
| kf83           | Forward binding rate constant of Gal3p and Gal80p            | $(\text{nM}\cdot\text{min})^{-1}$ | 2.5    |
| kr83           | Unbinding rate constant of Gal3p and Gal80p                  | $(\text{min})^{-1}$               | 462    |
| kf84           | Forward binding rate constant of Gal4p and Gal80p            | $(\text{nM}\cdot\text{min})^{-1}$ | 100    |
| kr84           | Unbinding rate constant of Gal4p and Gal80p                  | $(\text{min})^{-1}$               | 1300   |
| $\alpha_{G1}$  | Production rate of Gal3p from <i>GAL1p</i> promoter          | $\text{nM}\cdot\text{min}^{-1}$   | 35     |
| $\alpha_{G3}$  | Production rate of Gal3p                                     | $\text{nM}\cdot\text{min}^{-1}$   | 8      |
| $\alpha_{G4}$  | Production rate of Gal4p                                     | $\text{nM}\cdot\text{min}^{-1}$   | 3.6    |
| $\alpha_{G80}$ | Production rate of Gal80p                                    | $\text{nM}\cdot\text{min}^{-1}$   | 9      |
| $\alpha_0 G80$ | Basal production rate of Gal80p                              | $\text{nM}\cdot\text{min}^{-1}$   | 5.9    |
| KG3            | Transcriptional feedback threshold of Gal3p                  | nM                                | 64.9   |
| KG80           | Transcriptional feedback threshold of Gal80p                 | nM                                | 1.5    |
| n1             | Hill Coefficient for Gal4p binding to <i>GAL1p</i> promoter  | Dimensionless                     | 2      |
| n3             | Hill Coefficient for Gal4p binding to <i>GAL3p</i> promoter  | Dimensionless                     | 1      |
| n80            | Hill Coefficient for Gal4p binding to <i>GAL80p</i> promoter | Dimensionless                     | 1      |
| $\gamma_{G3}$  | Gal3p decay rate                                             | $\text{min}^{-1}$                 | 0.004  |
| $\gamma_{G4}$  | Gal4p decay rate                                             | $\text{min}^{-1}$                 | 0.0119 |
| $\gamma_{G80}$ | Gal80p decay rate                                            | $\text{min}^{-1}$                 | 0.0073 |
| $\gamma_{C83}$ | Gal3p-Gal80p complex decay rate                              | $\text{min}^{-1}$                 | 0.0527 |
| $\gamma_{C84}$ | Gal4p-Gal80p complex decay rate                              | $\text{min}^{-1}$                 | 0.0177 |

1. Karim, S. A., Curran, A. K. & Alper S. Hal. Characterization of plasmid burden and copy number in *Saccharomyces cerevisiae* for optimization of metabolic engineering applications. *FEMS Yeast Res.* **13**, 107–116 (2012).
2. Yano, K. & Fukasawa, T. Galactose-dependent reversible interaction of Gal3p with Gal80p in the induction pathway of Gal4p-activated genes of *Saccharomyces cerevisiae*. *Proc. Natl. Acad. Sci. U. S. A.* **94**, 1721–6 (1997).
3. Lavy, T., Kumar, P. R., He, H. & Joshua-Tor, L. The Gal3p transducer of the GAL regulon interacts with the Gal80p repressor in its ligand-induced closed conformation. *Genes Dev.* **26**, 294–303 (2012).
4. Gárdonyi, M., Jeppsson, M., Lidén, G., Gorwa-Grauslund, M. F. & Hahn-Hägerdal, B. Control of xylose consumption by xylose transport in recombinant *Saccharomyces cerevisiae*. *Biotechnol. Bioeng.* **82**, 818–24 (2003).
5. Reznicek, O. *et al.* Improved xylose uptake in *Saccharomyces cerevisiae* due to directed evolution of galactose permease Gal2 for sugar co-consumption. *J. Appl. Microbiol.* **119**, 99–111 (2015).
6. Reznicek, O., Sandra, F., Kassandra, L., Bernhad, S. & De Waal, P. P. Polypeptides with permease activity. (2014).
7. Ness, J. E. *et al.* Synthetic shuffling expands functional protein diversity by allowing amino acids to recombine independently. *Nat. Biotechnol.* **20**, 1251–1255 (2002).
8. Venturelli, O. S., El-samad, H. & Murray, R. M. Synergistic dual positive feedback loops established by molecular sequestration generate robust bimodal response. *Proc. Natl. Acad. Sci.* **109**, E3324–33 (2012).
9. Giniger, E. & Ptashne, M. Cooperative DNA binding of the yeast transcriptional activator GAL4. *Proc. Natl. Acad. Sci. U. S. A.* **85**, 382–386 (1988).
10. Kang, T., Martins, T. & Sadowski, I. Wild type GAL4 binds cooperatively to the GAL1-10 UASG in vitro. *J. Biol. Chem.* **268**, 9629–9635 (1993).
11. Reimand, J., Vaquerizas, J. M., Todd, A. E., Vilo, J. & Luscombe, N. M. Comprehensive reanalysis of transcription factor knockout expression data in *Saccharomyces cerevisiae* reveals many new targets. *Nucleic Acids Res.* **38**, 4768–4777 (2010).

12. Hu, Z., Killion, P. J. & Iyer, V. R. Genetic reconstruction of a functional transcriptional regulatory network. *Nat. Genet.* **39**, 683–687 (2007).
13. Ren, B. *et al.* Genome-wide location and function of DNA binding proteins. *Science (80-. )*. **290**, 2306–2309 (2000).
14. Choi, I. D., Jeong, M. Y., Ham, M. S., Sung, H. C. & Yun, C. W. Novel Reel regulates the expression of ENO1 via the Snf1 complex pathway in *Saccharomyces cerevisiae*. *Biochem. Biophys. Res. Commun.* **377**, 395–399 (2008).
