# Supplementary material for: A semi-synthetic regulon enables rapid growth of yeast on xylose
Source: PubMed Central journal article supplement (PMC5964326; doi:10.1038/s41467-018-03645-7), 2018-03-26
Supplement: 41467_2018_3645_MOESM3_ESM.pdf [file 41467_2018_3645_MOESM3_ESM.pdf]

## Description of Additional Supplementary Files

File Name: Supplementary Data 1

Description: **Differential gene expression analysis directly due to Gal4p.** Gal4p controlled genes from YEASTRACT that are differentially expressed in REG strains.

File Name: Supplementary Data 2

Description: **Differentially expressed transcription factors.** Genes that code for transcription factors (TFs) from YEASTRACT that are differentially expressed in REG strains.
