# Supplementary material for: A semi-synthetic regulon enables rapid growth of yeast on xylose
Source: PubMed Central journal article supplement (PMC5964326; doi:10.1038/s41467-018-03645-7), 2018-03-26
Supplement: 41467_2018_3645_MOESM4_ESM.pdf [file 41467_2018_3645_MOESM4_ESM.pdf]

**GAL4 controlled genes from YEASTRACT that are differentially expressed in REG strains**

AAT2  
ACS2  
ADH1  
AFR1  
AIM2  
AMD1  
ATP16  
ATP2  
ATR1  
BAR1  
BUB2  
CAF120  
CHS7  
CIR1  
CIS3  
CIT3  
CLN3  
CMC1  
CNL1  
CPA1  
CTS1  
CWC25  
CWP1  
CYC3  
DAP1  
DED1  
DFG16  
DMA1  
DMA2  
DPL1  
DPS1  
DSE2  
DUG1  
ECM33  
EGT2  
EMP46  
ERG4  
ERV46  
EXG2  
FAA1  
FRQ1  
FUM1  
FUN26  
GAS1  
GAS3  
GCY1

GGC1  
GIC2  
GIP2  
GSH1  
HEK2  
HEM2  
HFD1  
HHF2  
HMS2  
HNT3  
HOG1  
HOM2  
HOM6  
HSP10  
HTA2  
HTB1  
HXT1  
HXT2  
IMG2  
IPT1  
ISY1  
LAC1  
LTP1  
LYP1  
LYS1  
MBR1  
MCH5  
MDH1  
MEF1  
MET17  
MF(ALPHA)1  
MIP1  
MIR1  
MRP17  
MRP21  
MRP4  
MRPL24  
MRPL31  
MRPL32  
MRPL37  
MRPL38  
MRPL4  
MRPS16  
MRPS17  
MRPS18  
MSK1  
MSS51

MTM1  
MUM2  
MYO1  
MZM1  
NPL3  
NTE1  
NTH2  
NTR2  
OPT2  
OSW5  
OXA1  
PAA1  
PCL10  
PCS60  
PET9  
PHO80  
PHS1  
PIR3  
PLB2  
PLB3  
PMA2  
PMT2  
POR1  
POS5  
PST1  
PTA1  
PTR2  
QDR1  
RBD2  
RDR1  
RET2  
RIB4  
RIO1  
RNR4  
RPL3  
RPS22B  
RSM27  
RTT102  
RUP1  
SAM1  
SAM2  
SCT1  
SCW10  
SCW11  
SCW4  
SEO1  
SFB2

SFL1  
SHY1  
SLS1  
SNQ2  
SRL1  
SSC1  
SSU1  
SUN4  
SUR7  
SWS2  
TDA7  
TIM13  
TIP1  
TOA1  
TOM40  
TRX1  
TUB2  
USA1  
USO1  
UTH1  
VMA5  
VPH1  
WHI3  
WSC2  
WTM1  
YBL029W  
YBR197C  
YCR023C  
YDR010C  
YER152C  
YHB1  
YKL031W  
YLR030W  
YME1  
YMR147W  
YOR283W  
YOX1  
YPL067C  
YPL071C  
YPR053C  
ZEO1
