# Supplementary material for: A semi-synthetic regulon enables rapid growth of yeast on xylose
Source: PubMed Central journal article supplement (PMC5964326; doi:10.1038/s41467-018-03645-7), 2018-03-26
Supplement: 41467_2018_3645_MOESM5_ESM.pdf [file 41467_2018_3645_MOESM5_ESM.pdf]

**Genes that code for transcription factors (TFs) from YEASTRACT that are differentially expressed in REG stra**

Aft1

Aro80

Cbf1

Cup9

Eds1

Gcn4

Gsm1

Haa1

Hcm1

Ino4

Mig3

Pdr3

Rdr1

Rds2

Rph1

Rsf2

Sfl1

Stb5

Stp2

Sum1

Sut2

Swi5

Tye7

Vhr1

War1

YKL222C

YNR063W

Yap3

Yox1

ins
